# Supplementary material
Source: publisher site journal article supplement (https://www.dovepress.com/article/327646)
Supplement: Supplementary file 1 [file get_supplementary_file.php]

**Supplemental Table 1 Clinical characteristics of patients with or without PPFS**

|  | Non-PPFS patients  (N=181) | PPFS patients  (N=151) | P-value |
| --- | --- | --- | --- |
| **Preoperative comorbidities, n (%)** |  |  |  |
| Tuberculosis  No  Yes | 158(87.29)  23(12.71) | 134(88.74)  17(11.26) | 0.686 |
| Hypertension  No  Yes | 147(81.22)  34(18.78) | 122(80.79)  29(19.21) | 0.922 |
| Diabetes mellitus  No  Yes | 163(90.06)  18(9.94) | 141(93.38)  10(6.62) | 0.278 |
| Cerebrovascular disease  No  Yes | 121(66.85)  60(33.15) | 105(69.54)  46(30.46) | 0.601 |
| Chronic obstructive disease  No  Yes | 139(76.80)  42(23.20) | 111(73.51)  40(26.49) | 0.489 |
| Pulmonary atelectasis  No  Yes | 171(94.48)  10(5.52) | 144(95.36)  7(4.64) | 0.714 |
| **Lung surgery, n (%)**  No  Yes | 177(97.79)  4(2.21) | 151(100.00)  0(0.00) | 0.066 |
| **Perioperative conditions, n (%)** |  |  |  |
| Type of lung cancer surgery  Central  Peripheral | 16(8.84)  165(91.16) | 17(11.26)  134(88.74) | 0.463 |
| Histological  Adenocarcinoma  Squamous cell carcinoma  Other types | 129(71.27)  51(28.18)  1(0.55) | 120(79.47)  31(20.53)  0(0.00) | 0.172 |
| TNM stage  Ia  Ib  IIa  IIb  IIIa  IIIb | 65(35.91)  28(15.47)  32(17.68)  35(19.34)  17(9.39)  4(2.21) | 55(36.42)  18(11.92)  17(11.26)  24(15.89)  26(17.22)  11(7.28) | 0.032* |
| Lymphatic metastasis  No  Yes | 143(79.01)  38(20.99) | 101(66.89)  50(33.11) | 0.013* |
| Hospital stay  <15 days  ≥15 days | 44(24.31)  137(75.69) | 28(18.54)  123(81.46) | 0.204 |
| ICU stay  <3 days  ≥3 days | 174(96.13)  7(3.87) | 145(96.03)  6(3.97) | 0.960 |
| Operation time  <3 h  ≥3 h | 39(21.55)  142(78.45) | 31(20.53)  120(79.47) | 0.821 |
| Wound infection  No  Yes | 180(99.45)  1(0.55) | 150(99.34)  1(0.66) | 0.898 |
| **Blood parameters, n (%)** |  |  |  |
| Preoperative white blood cell count  <3.5 109/L  3.5–9.5 109/L  >9.5 109/L | 1(0.55)  132(72.93)  48(26.52) | 1(0.66)  114(75.50)  36(23.84) | 0.851 |
| Preoperative neutrophil ratio  <50  50–70  >70 | 14(7.73)  113(62.43)  54(29.83) | 13(8.61)  95(62.91)  43(28.48) | 0.936 |
| Preoperative albumin level  <40 g/dL  40–55 g/dL  >55 g/dL | 57(31.49)  123(67.96)  1(0.55) | 55(36.42)  96(63.58)  0(0.00) | 0.434 |
| Postoperative albumin level  <40 g/dL  40–55 g/dL  >55 g/dL | 152(83.98)  28(15.47)  1(0.55) | 129(85.43)  22(14.57)  0(0.00) | 0.638 |

**Notes:** * Significant difference compared between-groups (p < 0.05)

**Abbreviations:** PPFS, postoperative pneumonia in 4-6 months; ICU, intensive care unit
